# Supplementary material
Source: PubMed Central journal article supplement (PMC3779069)
Supplement: NIHMS481092-supplement-supplement_1.pdf [file NIHMS481092-supplement-supplement_1.pdf]

Supplementary to "A Novel Kernel for  
Correcting Size Bias in the Logistic Kernel  
Machine Test with an Application to  
Rheumatoid Arthritis"

Saskia Freytag<sup>1</sup>, Heike Bickeböller<sup>1</sup>, Christopher I. Amos<sup>2</sup>,  
Thomas Kneib<sup>3</sup>, and Martin Schlather<sup>4</sup>

<sup>1</sup>Department of Genetic Epidemiology, Georg-August University Göttingen, Medical  
School, Göttingen, 37073, Germany

<sup>2</sup>Department of Mechanical Engineering, Dartmouth College, Geisel School of  
Medicine, Lebanon, NH 03766, USA

<sup>3</sup>Department of Statistics and Econometrics, Georg-August University Göttingen,  
Göttingen, 37073, Germany

<sup>4</sup>Institute for Mathematics, University of Mannheim, Mannheim, 68131, Germany

November 19, 2012

## A. Known Susceptibility Genes for Rheumatoid Arthritis

Table 1: Non-HLA genes implicated in genome-wide association studies with European genotypic data (that reached study specific Bonferroni-corrected significance threshold  $p < 0.05$ ).

| Gene<br>(HUGO) | Gene<br>(KEGG) | Reference                              |
|----------------|----------------|----------------------------------------|
| TNFSF14        | hsa:8740       | [18], [9]                              |
| PTPN22         | hsa:26191      | [2], [13], [4], [8], [3], [12]         |
| CD2            | hsa:914        | [19], [24]                             |
| IGSF2          | hsa:9398       | [19]                                   |
| CD58           | hsa:965        | [19], [24]                             |
| FCGR2A         | hsa:2212       | [19]                                   |
| PTPRC          | hsa:5788       | [19]                                   |
| REL            | hsa:5966       | [6], [24]                              |
| AFF3           | hsa:3899       | [1], [21]                              |
| STAT4          | hsa:6775       | [20], [5], [24]                        |
| CD28           | hsa:940        | [19]                                   |
| CTLA4          | hsa:1493       | [16], [8], [6], [24]                   |
| IL2            | hsa:3558       | [23], [3], [5], [24]                   |
| IL21           | hsa:59067      | [23], [5], [24]                        |
| PRDM1          | hsa:639        | [19]                                   |
| TNFAIP3        | hsa:7128       | [17], [22], [14], [8], [18], [7], [24] |
| TAGAP          | hsa:117289     | [19]                                   |
| BLK            | hsa:640        | [6], [7], [14]                         |
| CCL21          | hsa:6366       | [18], [14], [21]                       |
| TRAF1          | hsa:7185       | [17], [11], [18], [15], [24]           |
| IL2RA          | hsa:3559       | [22], [10], [3], [21]                  |
| PRKCQ          | hsa:5588       | [18], [1], [24]                        |
| RAG1           | hsa:5896       | [18]                                   |

|         |                |                      |
|---------|----------------|----------------------|
| TRAF6   | hsa:7189       | [18]                 |
| KIF5A   | hsa:3798       | [18], [1]            |
| CD40    | hsa:958        | [18], [14]           |
| IL2RB   | hsa:3560       | [1], [3]             |
| MMEL1   | has:79258      | [18], [9]            |
| ICOS    | hsa:29851      | [16], [8], [6], [24] |
| CDK6    | hsa:1021       | [14], [18]           |
| PXK     | hsa:54899      | [8], [21]            |
| IRF5    | hsa:3663       | [21], [7]            |
| GPSM3   | hsa:63940      | [12]                 |
| RBPJ    | hsa:3516       | [21]                 |
| IL6ST   | hsa:3572       | [21]                 |
| CCR6    | hsa:1235       | [21]                 |
| AIF1    | hsa:199        | [12]                 |
| CREBL1  | hsa:1388       | [12]                 |
| EHMT2   | hsa:10919      | [12]                 |
| AGPAT1  | hsa:10554      | [12]                 |
| RPS18   | hsa:6222       | [12]                 |
| RDBP    | hsa:7936       | [12]                 |
| BAT3    | hsa:7917       | [12]                 |
| BAT4    | hsa:7918       | [12]                 |
| ZFP57   | hsa:346171     | [12]                 |
| T1D     | hsa:1000382463 | [3]                  |
| BANK1   | hsa:55024      | [7]                  |
| ANKRD55 | hsa:79722      | [24]                 |
| UBE2L3  | hsa:7332       | [14]                 |
| UBASH3A | hsa:53347      | [14]                 |

## References

- [1] A. Barton, S. Eyre, X. Ke, A. Hinks, J. Bowes, E. Flynn, P. Martin, YEAR Consortium, BIRAC Consortium, A. G. Wilson, A. W. Morgan, P. Emery, S. Steer, L. J. Hocking, D. M. Reid, P. Harrison,

- P. Wordsworth, W. Thomson, and J. Worthington. Identification of AF4/FMR2 family, member 3 (AFF3) as a novel rheumatoid arthritis susceptibility locus and confirmation of two further pan-autoimmune susceptibility genes. *Human Molecular Genetics*, 18(13):2518–2522, Apr. 2009.
- [2] A. Begovich, V. Carlton, L. Honigberg, S. Schrodi, A. Chokkalingam, H. Alexander, K. Ardlie, Q. Huang, A. Smith, and J. Spoecker. A missense single-nucleotide polymorphism in a gene encoding a protein tyrosine phosphatase (PTPN22) is associated with rheumatoid arthritis. *The American Journal of Human Genetics*, 75(2):330–337, Aug. 2004.
- [3] P. R. Burton, D. G. Clayton, L. R. Cardon, N. Craddock, P. Deloukas, A. Duncanson, D. P. Kwiatkowski, M. I. McCarthy, W. H. Ouwehand, N. J. Samani, J. A. Todd, P. Donnelly, J. C. Barrett, P. R. Burton, D. Davison, P. Donnelly, D. Easton, D. Evans, H.-T. Leung, J. L. Marchini, A. P. Morris, C. C. A. Spencer, M. D. Tobin, L. R. Cardon, D. G. Clayton, A. P. Attwood, J. P. Boorman, B. Cant, U. Everson, J. M. Hussey, J. D. Jolley, A. S. Knight, K. Koch, E. Meech, S. Nutland, C. V. Prowse, H. E. Stevens, N. C. Taylor, G. R. Walters, N. M. Walker, N. A. Watkins, T. Winzer, J. A. Todd, W. H. Ouwehand, R. W. Jones, W. L. McArdle, S. M. Ring, D. P. Strachan, M. Pembrey, G. Breen, D. St Clair, S. Caesar, K. Gordon-Smith, L. Jones, C. Fraser, E. K. Green, D. Grozeva, M. L. Hamshere, P. A. Holmans, I. R. Jones, G. Kirov, V. Moskvina, I. Nikolov, M. C. O’Donovan, M. J. Owen, N. Craddock, D. A. Collier, A. Elkin, A. Farmer, R. Williamson, P. McGuffin, A. H. Young, I. N. Ferrier, S. G. Ball, A. J. Balmforth, J. H. Barrett, D. T. Bishop, M. M. Iles, A. Maqbool, N. Yuldasheva, A. S. Hall, P. S. Braund, P. R. Burton, R. J. Dixon, M. Mangino, S. Stevens, M. D. Tobin, J. R. Thompson, N. J. Samani, F. Bredin, M. Tremelling, M. Parkes, H. Drummond, C. W. Lees, E. R. Nimmo, J. Satsangi, S. A. Fisher, A. Forbes, C. M. Lewis, C. M. Onnie, N. J. Prescott, J. Sanderson, C. G. Mathew, J. Barbour, M. K. Mohiuddin, C. E. Todhunter, J. C. Mansfield, T. Ahmad, F. R. Cummings, D. P. Jewell, J. Webster,

M. J. Brown, D. G. Clayton, G. M. Lathrop, J. Connell, A. Dominiczak, N. J. Samani, C. A. B. Marcano, B. Burke, R. Dobson, J. Gungadoo, K. L. Lee, P. B. Munroe, S. J. Newhouse, A. Onipinla, C. Wallace, M. Xue, M. Caulfield, M. Farrall, A. Barton, , T. B. i. R. G. Genomics (BRAGGS), I. N. Bruce, H. Donovan, S. Eyre, P. D. Gilbert, S. L. Hider, A. M. Hinks, S. L. John, C. Potter, A. J. Silman, D. P. M. Symmons, W. Thomson, J. Worthington, D. G. Clayton, D. B. Dunger, S. Nutland, H. E. Stevens, N. M. Walker, B. Widmer, J. A. Todd, T. M. Frayling, R. M. Freathy, H. Lango, J. R. B. Perry, B. M. Shields, M. N. Weedon, A. T. Hattersley, G. A. Hitman, M. Walker, K. S. Elliott, C. J. Groves, C. M. Lindgren, N. W. Rayner, N. J. Timpson, E. Zeggini, M. I. McCarthy, M. Newport, G. Sirugo, E. Lyons, F. Vannberg, A. V. S. Hill, L. A. Bradbury, C. Farrar, J. J. Pointon, P. Wordsworth, M. A. Brown, J. A. Franklyn, J. M. Heward, M. J. Simmonds, S. C. L. Gough, S. Seal, B. C. Susceptibility Collaboration (UK), M. R. Stratton, N. Rahman, M. Ban, A. Goris, S. J. Sawcer, A. Compston, D. Conway, M. Jallow, M. Newport, G. Sirugo, K. A. Rockett, D. P. Kwiatkowski, S. J. Bumpstead, A. Chaney, K. Downes, M. J. R. Ghorri, R. Gwilliam, S. E. Hunt, M. Inouye, A. Keniry, E. King, R. McGinnis, S. Potter, R. Ravindrara-jah, P. Whittaker, C. Widdon, D. Withers, P. Deloukas, H.-T. Leung, S. Nutland, H. E. Stevens, N. M. Walker, J. A. Todd, D. Easton, D. G. Clayton, P. R. Burton, M. D. Tobin, J. C. Barrett, D. Evans, A. P. Morris, L. R. Cardon, N. J. Cardin, D. Davison, T. Ferreira, J. Pereira-Gale, I. B. Hallgrimsdttir, B. N. Howie, J. L. Marchini, C. C. A. Spencer, Z. Su, Y. Y. Teo, D. Vukcevic, P. Donnelly, D. Bentley, M. A. Brown, L. R. Cardon, M. Caulfield, D. G. Clayton, A. Compston, N. Craddock, P. Deloukas, P. Donnelly, M. Farrall, S. C. L. Gough, A. S. Hall, A. T. Hattersley, A. V. S. Hill, D. P. Kwiatkowski, C. G. Mathew, M. I. McCarthy, W. H. Ouwehand, M. Parkes, M. Pembrey, N. Rahman, N. J. Samani, M. R. Stratton, J. A. Todd, and J. Worthington. Genome-wide association study of 14,000 cases of seven common diseases and 3,000 shared controls. *Nature*, 447(7145):661–678, June 2007.

- [4] V. E. Carlton, X. Hu, A. P. Chokkalingam, S. J. Schrodi, R. Brandon, H. C. Alexander, M. Chang, J. J. Catanese, D. U. Leong, K. G. Ardlie, D. L. Kastner, M. F. Seldin, L. A. Criswell, P. K. Gregersen, E. Beasley, G. Thomson, C. I. Amos, and A. B. Begovich. PTPN22 genetic variation: Evidence for multiple variants associated with rheumatoid arthritis. *The American Journal of Human Genetics*, 77(4):567–581, Oct. 2005.
- [5] M. J. H. Coenen, G. Trynka, S. Heskamp, B. Franke, C. C. van Diemen, J. Smolonska, M. van Leeuwen, E. Brouwer, M. H. Boezen, D. S. Postma, M. Platteel, P. Zanen, J.-W. W. J. Lammers, H. J. M. Groen, W. P. T. M. Mali, C. J. Mulder, G. J. Tack, W. H. M. Verbeek, V. M. Wolters, R. H. J. Houwen, M. L. Mearin, D. A. van Heel, T. R. D. J. Radstake, P. L. C. M. van Riel, C. Wijmenga, P. Barrera, and A. Zhernakova. Common and different genetic background for rheumatoid arthritis and coeliac disease. *Human Molecular Genetics*, 18(21):4195–4203, July 2009.
- [6] P. K. Gregersen, C. I. Amos, A. T. Lee, Y. Lu, E. F. Remmers, D. L. Kastner, M. F. Seldin, L. A. Criswell, R. M. Plenge, V. M. Holers, T. R. Mikuls, T. Sokka, L. W. Moreland, S. L. Bridges, G. Xie, A. B. Begovich, and K. A. Siminovitch. REL, encoding a member of the NF- $\kappa$ B family of transcription factors, is a newly defined risk locus for rheumatoid arthritis. *Nature Genetics*, 41(7):820–823, June 2009.
- [7] T. M. Jarvinen, A. Hellquist, M. Zucchelli, S. Koskenmies, J. Panellius, T. Hasan, H. Julkunen, M. D’Amato, and J. Kere. Replication of GWAS-identified systemic lupus erythematosus susceptibility genes affirms b-cell receptor pathway signalling and strengthens the role of IRF5 in disease susceptibility in a northern european population. *Rheumatology*, 51(1):87–92, Oct. 2011.
- [8] F. Kurreeman, K. Liao, L. Chibnik, B. Hickey, E. Stahl, V. Gainer, G. Li, L. Bry, S. Mahan, K. Ardlie, B. Thomson, P. Szolovits, S. Churchill, S. N. Murphy, T. Cai, S. Raychaudhuri, I. Kohane, E. Karlson, and

- R. M. Plenge. Genetic basis of autoantibody positive and negative rheumatoid arthritis risk in a multi-ethnic cohort derived from electronic health records. *The American Journal of Human Genetics*, 88(1):57–69, Jan. 2011.
- [9] F. Kurreeman, E. Stahl, Y. Okada, K. Liao, D. Diogo, S. Raychaudhuri, J. Freudenberg, Y. Kochi, N. Patsopoulos, N. Gupta, C. Sandor, S.-Y. Bang, H.-S. Lee, L. Padyukov, A. Suzuki, K. Siminovitch, J. Worthington, P. Gregersen, L. Hughes, R. Reynolds, S. Bridges, S.-C. Bae, K. Yamamoto, and R. Plenge. Use of a multiethnic approach to identify rheumatoid- arthritis-susceptibility loci, 1p36 and 17q12. *The American Journal of Human Genetics*, 90(3):524–532, Mar. 2012.
- [10] F. A. S. Kurreeman, N. A. Daha, M. Chang, J. J. Catanese, A. B. Begovich, T. W. J. Huizinga, and R. E. M. Toes. Association of IL2RA and IL2RB with rheumatoid arthritis: a replication study in a dutch population. *Annals of the Rheumatic Diseases*, 68(11):1789–1790, Oct. 2009.
- [11] F. A. S. Kurreeman, L. Padyukov, R. B. Marques, S. J. Schrodi, M. Seddighzadeh, G. Stoeken-Rijsbergen, A. H. M. van der Helm-van Mil, C. F. Allaart, W. Verduyn, J. Houwing-Duistermaat, L. Alfredsson, A. B. Begovich, L. Klareskog, T. W. J. Huizinga, and R. E. M. Toes. A candidate gene approach identifies the TRAF1/C5 region as a risk factor for rheumatoid arthritis. *PLoS Medicine*, 4(9):e278, 2007.
- [12] S.-F. Luo, R.-Y. Fang, H.-L. Hsieh, P.-L. Chi, C.-C. Lin, L.-D. Hsiao, C.-C. Wu, J.-S. Wang, and C.-M. Yang. Involvement of MAPKs and NF- $\kappa$ B in tumor necrosis factor induced vascular cell adhesion molecule 1 expression in human rheumatoid arthritis synovial fibroblasts. *Arthritis & Rheumatism*, 62(1):105–116, Jan. 2010.
- [13] L. Michou, S. Lasbleiz, A.-C. Rat, P. Migliorini, A. Balsa, R. Westhovens, P. Barrera, H. Alves, C. Pierlot, E. Glikmans, S. Garnier, J. Dausset, C. Vaz, M. Fernandes, E. Petit-Teixeira, I. Lemaire,

- D. Pascual-Salcedo, S. Bombardieri, J. Dequeker, T. R. Radstake, P. Van Riel, L. van de Putte, A. Lopes-Vaz, B. Prum, T. Bardin, P. Dieude, F. Cornelis, and European Consortium on Rheumatoid Arthritis Families. Linkage proof for PTPN22, a rheumatoid arthritis susceptibility gene and a human autoimmunity gene. *Proceedings of the National Academy of Sciences*, 104(5):1649–1654, Jan. 2007.
- [14] G. Orozco, S. Eyre, A. Hinks, J. Bowes, A. W. Morgan, A. G. Wilson, P. Wordsworth, S. Steer, L. Hocking, UKRAG consortium, W. Thomson, J. Worthington, and A. Barton. Study of the common genetic background for rheumatoid arthritis and systemic lupus erythematosus. *Annals of the Rheumatic Diseases*, 70(3):463–468, Nov. 2010.
- [15] N. A. Patsopoulos and J. P. A. Ioannidis. Susceptibility variants for rheumatoid arthritis in the TRAF1-C5 and 6q23 loci: a meta-analysis. *Annals of the Rheumatic Diseases*, 69(3):561–566, Apr. 2009.
- [16] R. M. Plenge, L. Padyukov, E. F. Remmers, S. Purcell, A. T. Lee, E. W. Karlson, F. Wolfe, D. L. Kastner, L. Alfredsson, D. Altshuler, P. K. Gregersen, L. Klareskog, and J. D. Rioux. Replication of putative candidate-gene associations with rheumatoid arthritis in >4,000 samples from north america and sweden: association of susceptibility with PTPN22, CTLA4, and PADI4. *American journal of human genetics*, 77(6):1044–1060, Dec. 2005. PMID: 16380915.
- [17] R. M. Plenge, M. Seielstad, L. Padyukov, A. T. Lee, E. F. Remmers, B. Ding, A. Liew, H. Khalili, A. Chandrasekaran, L. R. Davies, W. Li, A. K. Tan, C. Bonnard, R. T. Ong, A. Thalamuthu, S. Pettersson, C. Liu, C. Tian, W. V. Chen, J. P. Carulli, E. M. Beckman, D. Altshuler, L. Alfredsson, L. A. Criswell, C. I. Amos, M. F. Seldin, D. L. Kastner, L. Klareskog, and P. K. Gregersen. TRAF1C5 as a risk locus for rheumatoid arthritis a genomewide study. *New England Journal of Medicine*, 357(12):1199–1209, Sept. 2007.
- [18] S. Raychaudhuri, E. F. Remmers, A. T. Lee, R. Hackett, C. Guiducci, N. P. Burt, L. Gianniny, B. D. Korman, L. Padyukov, F. A. S. Kur-



- reeman, M. Chang, J. J. Catanese, B. Ding, S. Wong, A. H. M. van der Helm-van Mil, B. M. Neale, J. Coblyn, J. Cui, P. P. Tak, G. J. Wolbink, J. B. A. Crusius, I. E. v. d. Horst-Bruinsma, L. A. Criswell, C. I. Amos, M. F. Seldin, D. L. Kastner, K. G. Ardlie, L. Alfredsson, K. H. Costenbader, D. Altshuler, T. W. J. Huizinga, N. A. Shadick, M. E. Weinblatt, N. de Vries, J. Worthington, M. Seielstad, R. E. M. Toes, E. W. Karlson, A. B. Begovich, L. Klareskog, P. K. Gregersen, M. J. Daly, and R. M. Plenge. Common variants at CD40 and other loci confer risk of rheumatoid arthritis. *Nature Genetics*, 40(10):1216–1223, Sept. 2008.
- [19] S. Raychaudhuri, B. P. Thomson, E. F. Remmers, S. Eyre, A. Hinks, C. Guiducci, J. J. Catanese, G. Xie, E. A. Stahl, R. Chen, L. Alfredsson, C. I. Amos, K. G. Ardlie, A. Barton, J. Bowes, N. P. Burt, M. Chang, J. Coblyn, K. H. Costenbader, L. A. Criswell, J. B. A. Crusius, J. Cui, P. L. De Jager, B. Ding, P. Emery, E. Flynn, P. Harrison, L. J. Hocking, T. W. J. Huizinga, D. L. Kastner, X. Ke, F. A. S. Kurreeman, A. T. Lee, X. Liu, Y. Li, P. Martin, A. W. Morgan, L. Padyukov, D. M. Reid, M. Seielstad, M. F. Seldin, N. A. Shadick, S. Steer, P. P. Tak, W. Thomson, A. H. M. van der Helm-van Mil, I. E. van der Horst-Bruinsma, M. E. Weinblatt, A. G. Wilson, G. J. Wolbink, P. Wordsworth, D. Altshuler, E. W. Karlson, R. E. M. Toes, N. de Vries, A. B. Begovich, K. A. Siminovitch, J. Worthington, L. Klareskog, P. K. Gregersen, M. J. Daly, and R. M. Plenge. Genetic variants at CD28, PRDM1 and CD2/CD58 are associated with rheumatoid arthritis risk. *Nature Genetics*, 41(12):1313–1318, Nov. 2009.
- [20] E. F. Remmers, R. M. Plenge, A. T. Lee, R. R. Graham, G. Hom, T. W. Behrens, P. I. de Bakker, J. M. Le, H.-S. Lee, F. Batliwalla, W. Li, S. L. Masters, M. G. Booty, J. P. Carulli, L. Padyukov, L. Alfredsson, L. Klareskog, W. V. Chen, C. I. Amos, L. A. Criswell, M. F. Seldin, D. L. Kastner, and P. K. Gregersen. STAT4 and the risk of rheumatoid arthritis and systemic lupus erythematosus. *New England Journal of Medicine*, 357(10):977–986, Sept. 2007.

- [21] E. A. Stahl, S. Raychaudhuri, E. F. Remmers, G. Xie, S. Eyre, B. P. Thomson, Y. Li, F. A. S. Kurreeman, A. Zhernakova, A. Hinks, C. Guiducci, R. Chen, L. Alfredsson, C. I. Amos, K. G. Ardlie, A. Barton, J. Bowes, E. Brouwer, N. P. Burt, J. J. Catanese, J. Coblyn, M. J. H. Coenen, K. H. Costenbader, L. A. Criswell, J. B. A. Crusius, J. Cui, P. I. W. de Bakker, P. L. De Jager, B. Ding, P. Emery, E. Flynn, P. Harrison, L. J. Hocking, T. W. J. Huizinga, D. L. Kastner, X. Ke, A. T. Lee, X. Liu, P. Martin, A. W. Morgan, L. Padyukov, M. D. Posthumus, T. R. D. J. Radstake, D. M. Reid, M. Seielstad, M. F. Seldin, N. A. Shadick, S. Steer, P. P. Tak, W. Thomson, A. H. M. van der Helm-van Mil, I. E. van der Horst-Bruinsma, C. E. van der Schoot, P. L. C. M. van Riel, M. E. Weinblatt, A. G. Wilson, G. J. Wolbink, B. P. Wordsworth, C. Wijmenga, E. W. Karlson, R. E. M. Toes, N. de Vries, A. B. Begovich, J. Worthington, K. A. Siminovitch, P. K. Gregersen, L. Klareskog, and R. M. Plenge. Genome-wide association study meta-analysis identifies seven new rheumatoid arthritis risk loci. *Nature Genetics*, 42(6):508–514, May 2010.
- [22] W. Thomson, A. Barton, X. Ke, S. Eyre, A. Hinks, J. Bowes, R. Donn, D. Symmons, S. Hider, I. N. Bruce, A. G. Wilson, I. Marinou, A. Morgan, P. Emery, A. Carter, S. Steer, L. Hocking, D. M. Reid, P. Wordsworth, P. Harrison, D. Strachan, and J. Worthington. Rheumatoid arthritis association at 6q23. *Nature Genetics*, 39(12):1431–1433, Nov. 2007.
- [23] A. Zhernakova, B. Z. Alizadeh, M. Bevova, M. A. van Leeuwen, M. J. Coenen, B. Franke, L. Franke, M. D. Posthumus, D. A. van Heel, G. van der Steege, T. R. Radstake, P. Barrera, B. O. Roep, B. P. Koeleman, and C. Wijmenga. Novel association in chromosome 4q27 region with rheumatoid arthritis and confirmation of type 1 diabetes point to a general risk locus for autoimmune diseases. *The American Journal of Human Genetics*, 81(6):1284–1288, Dec. 2007.
- [24] A. Zhernakova, E. A. Stahl, G. Trynka, S. Raychaudhuri, E. A. Fes-

ten, L. Franke, H.-J. Westra, R. S. N. Fehrmann, F. A. S. Kurreeman, B. Thomson, N. Gupta, J. Romanos, R. McManus, A. W. Ryan, G. Turner, E. Brouwer, M. D. Posthumus, E. F. Remmers, F. Tucci, R. Toes, E. Grandone, M. C. Mazzilli, A. Rybak, B. Cukrowska, M. J. H. Coenen, T. R. D. J. Radstake, P. L. C. M. van Riel, Y. Li, P. I. W. de Bakker, P. K. Gregersen, J. Worthington, K. A. Siminovitch, L. Klareskog, T. W. J. Huizinga, C. Wijmenga, and R. M. Plenge. Meta-analysis of genome-wide association studies in celiac disease and rheumatoid arthritis identifies fourteen non-HLA shared loci. *PLoS Genetics*, 7(2):e1002004, Feb. 2011.
